# Supplementary material for: Dose finding studies for therapies with late‐onset toxicities: A comparison study of designs
Source: PubMed Central journal article supplement (PMC10092569; doi:10.1002/sim.9593), 2022-10-17
Supplement: SIM-41-5767-s001.pdf [file SIM-41-5767-s001.pdf]

# Supplementary material for ‘Dose Finding Studies for Therapies with Late-Onset Toxicities: A Comparison Study of Designs’

## 1 Scenarios

| Scenario | 1.5MBq      | 2.5MBq      | 3.5MBq      | 4.5MBq      | 6MBq        | 7MBq        |
|----------|-------------|-------------|-------------|-------------|-------------|-------------|
| 1 (A)    | <b>0.30</b> | 0.40        | 0.50        | 0.60        | 0.70        | 0.80        |
| 2        | 0.20        | <b>0.30</b> | 0.40        | 0.50        | 0.60        | 0.70        |
| 3        | 0.10        | 0.20        | <b>0.30</b> | 0.40        | 0.50        | 0.60        |
| 4        | 0.05        | 0.10        | 0.20        | <b>0.30</b> | 0.40        | 0.50        |
| 5        | 0.05        | 0.10        | 0.15        | 0.20        | <b>0.30</b> | 0.40        |
| 6        | 0.02        | 0.05        | 0.10        | 0.15        | 0.20        | <b>0.30</b> |
| 7 (B)    | 0.15        | 0.20        | 0.25        | <b>0.30</b> | 0.45        | 0.60        |
| 8        | 0.05        | 0.15        | <b>0.30</b> | 0.35        | 0.40        | 0.45        |
| 9 (C)    | 0.40        | 0.45        | 0.50        | 0.55        | 0.60        | 0.65        |
| 10       | 0.05        | 0.15        | <b>0.25</b> | 0.35        | 0.45        | 0.55        |
| 11       | 0.15        | <b>0.20</b> | 0.35        | 0.40        | 0.45        | 0.50        |
| 12       | 0.05        | 0.10        | 0.15        | 0.20        | <b>0.25</b> | 0.40        |
| 13       | 0.06        | 0.07        | 0.08        | 0.09        | 0.11        | 0.12        |
| 14       | 0.10        | 0.14        | 0.21        | <b>0.30</b> | 0.46        | 0.58        |
| 15       | 0.16        | <b>0.30</b> | 0.50        | 0.70        | 0.89        | 0.95        |
| 16       | 0.55        | 0.91        | 0.99        | 1.00        | 1.00        | 1.00        |
| 17 (D)   | 0.05        | 0.05        | <b>0.05</b> | 0.80        | 0.80        | 0.80        |

Table 1: P(DLT) in cycle 1 for each dose across 17 defined scenarios. MTD in **bold**.

| Scenario | 1.5MBq | 2.5MBq | 3.5MBq | 4.5MBq | 6MBq  | 7MBq  |
|----------|--------|--------|--------|--------|-------|-------|
| 1 (A)    | 0.289  | 0.385  | 0.433  | 0.457  | 0.481 | 0.506 |
| 2        | 0.193  | 0.289  | 0.385  | 0.433  | 0.457 | 0.481 |
| 3        | 0.096  | 0.193  | 0.289  | 0.385  | 0.433 | 0.457 |
| 4        | 0.048  | 0.096  | 0.193  | 0.289  | 0.385 | 0.433 |
| 5        | 0.048  | 0.096  | 0.145  | 0.193  | 0.289 | 0.385 |
| 6        | 0.019  | 0.048  | 0.096  | 0.145  | 0.193 | 0.289 |
| 7 (B)    | 0.145  | 0.193  | 0.241  | 0.289  | 0.409 | 0.457 |
| 8        | 0.048  | 0.145  | 0.289  | 0.337  | 0.385 | 0.409 |
| 9 (C)    | 0.385  | 0.409  | 0.433  | 0.445  | 0.457 | 0.469 |
| 10       | 0.048  | 0.145  | 0.241  | 0.337  | 0.409 | 0.445 |
| 11       | 0.145  | 0.193  | 0.337  | 0.385  | 0.409 | 0.433 |
| 12       | 0.048  | 0.096  | 0.145  | 0.193  | 0.241 | 0.385 |
| 13       | 0.058  | 0.067  | 0.077  | 0.087  | 0.106 | 0.116 |
| 14       | 0.096  | 0.135  | 0.202  | 0.289  | 0.414 | 0.452 |
| 15       | 0.154  | 0.289  | 0.433  | 0.481  | 0.528 | 0.542 |
| 16       | 0.445  | 0.532  | 0.552  | 0.554  | 0.554 | 0.554 |
| 17 (D)   | 0.048  | 0.048  | 0.048  | 0.506  | 0.506 | 0.506 |

Table 2: E(nTTP) in cycle 1 for each dose across 17 defined scenarios

| Scenario | 1.5MBq | 2.5MBq | 3.5MBq | 4.5MBq | 6MBq  | 7MBq  |
|----------|--------|--------|--------|--------|-------|-------|
| 1 (A)    | 0.391  | 0.503  | 0.606  | 0.701  | 0.788 | 0.866 |
| 2        | 0.270  | 0.391  | 0.503  | 0.606  | 0.701 | 0.788 |
| 3        | 0.140  | 0.270  | 0.391  | 0.503  | 0.606 | 0.701 |
| 4        | 0.071  | 0.140  | 0.270  | 0.391  | 0.503 | 0.606 |
| 5        | 0.071  | 0.140  | 0.206  | 0.270  | 0.391 | 0.503 |
| 6        | 0.029  | 0.071  | 0.140  | 0.206  | 0.270 | 0.391 |
| 7 (B)    | 0.206  | 0.270  | 0.332  | 0.391  | 0.556 | 0.701 |
| 8        | 0.071  | 0.206  | 0.391  | 0.448  | 0.503 | 0.556 |
| 9 (C)    | 0.503  | 0.556  | 0.606  | 0.655  | 0.701 | 0.746 |
| 10       | 0.071  | 0.206  | 0.332  | 0.448  | 0.556 | 0.655 |
| 11       | 0.206  | 0.270  | 0.448  | 0.503  | 0.556 | 0.606 |
| 12       | 0.071  | 0.140  | 0.206  | 0.270  | 0.332 | 0.503 |
| 13       | 0.085  | 0.099  | 0.112  | 0.126  | 0.153 | 0.166 |
| 14       | 0.140  | 0.193  | 0.282  | 0.391  | 0.566 | 0.683 |
| 15       | 0.219  | 0.391  | 0.606  | 0.788  | 0.930 | 0.969 |
| 16       | 0.655  | 0.944  | 0.994  | 1.000  | 1.000 | 1.000 |
| 17 (D)   | 0.071  | 0.071  | 0.071  | 0.866  | 0.866 | 0.866 |

Table 3: P(DLT) in cycles 1-3 for each dose across 17 defined scenarios

## 2 Grid of Hyper-Parameter Values Used in Prior Calibration

|                   | Grid                                                                                                                                                                                                                                                                                                                                                                                |
|-------------------|-------------------------------------------------------------------------------------------------------------------------------------------------------------------------------------------------------------------------------------------------------------------------------------------------------------------------------------------------------------------------------------|
| <b>TITE-CRM</b>   | $\sigma^2 \in \{0.1, 0.5, 1, 1.5\}$<br>$d \in \{(0.05, 0.10, 0.15, 0.20, 0.25, 0.30), (0.05, 0.10, 0.20, 0.30, 0.50, 0.60), (0.15, 0.20, .025, 0.30, 0.35, 0.40), (0.15, 0.20, 0.30, 0.40, 0.50, 0.70)\}$                                                                                                                                                                           |
| <b>TITE-CRM2</b>  | $\mu_{a_0} \in \{-1, 1\}$<br>$\sigma_{a_0}^{-2} \in \{0.1, 0.3\}$<br>$\mu_{a_1} \in \{\log(0.2), \log(0.4)\}$<br>$\sigma_{a_1}^{-2} \in \{0.1, 0.3\}$                                                                                                                                                                                                                               |
| <b>ICSDP</b>      | $\pi^*_{1} \in \{0.05, 0.10, 0.15, 0.20\}$<br>$\pi^*_J \in \{0.30, 0.40, 0.50, 0.60\}$<br>$n_0 \in \{2, 3, 4, 5, 6\}$                                                                                                                                                                                                                                                               |
| <b>POMM</b>       | $p_{1*} \in (0.05, 0.10, 0.15, 0.20, 0.25, 0.30), (0.05, 0.1, 0.20, 0.30, 0.50, 0.70), (0.15, 0.20, 0.25, 0.30, 0.35, 0.40), (0.15, 0.20, 0.30, 0.40, 0.50, 0.70)$<br>$n_0 \in \{2, 3, 4, 5, 6\}$<br>$p_1^{G^2}/p_1 \in \{(0.00, 0.20, 0.40, 0.60, 0.80, 1.00), (0.05, 0.10, 0.15, 0.20, 0.25, 0.30), (0.10, 0.20, 0.30, 0.50, 0.70, 0.90), (0.20, 0.30, 0.40, 0.50, 0.60, 0.70)\}$ |
| <b>nTTP</b>       | $\mu_{\beta_0} \in \{0.0, 0.1\}$<br>$\sigma_{\beta_0}^2 \in \{10, 100, 100\}$<br>$\mu_{\beta_1} \in \{0.05, 0.50\}$<br>$\sigma_{\beta_1}^2 \in \{10, 100, 100\}$<br>$\mu_{\beta_2} \in \{0\}$<br>$\sigma_{\beta_2}^2 \in \{10, 100, 100\}$                                                                                                                                          |
| <b>TITE-BOIN</b>  | $\tau_1 \in \{0.2346, 0.2737, 0.3128, 0.3519\}$<br>$\tau_2 \in \{0.4301, 0.4692, 0.5083, 0.5474\}$<br>$\frac{\alpha}{\alpha+\beta} \in \{0.1, 0.1955, 0.391, 0.5\}$<br>$\alpha + \beta \in \{1, 2\}$                                                                                                                                                                                |
| <b>TITE-mTPI2</b> | $\tau_1 \in \{0.2346, 0.2737, 0.3128, 0.3519\}$<br>$\tau_2 \in \{0.4301, 0.4692, 0.5083, 0.5474\}$                                                                                                                                                                                                                                                                                  |
| <b>R-mTPI2</b>    | $\tau_1 \in \{0.2346, 0.2737, 0.3128, 0.3519\}$<br>$\tau_2 \in \{0.4301, 0.4692, 0.5083, 0.5474\}$                                                                                                                                                                                                                                                                                  |

Table 4: The grids of hyper-parameters searched over for the prior callibration procedure.

## 3 Additional Results Tables

|        | TITECRM | TITECRM2 | ICSDP | POMM | nTTP | TITEBOIN | TITE_mTPI2 | R_mTPI2 | Benchmark P(DLT) | Benchmark E(nTTP) |
|--------|---------|----------|-------|------|------|----------|------------|---------|------------------|-------------------|
| 1 (A)  | 80      | 87       | 55    | 41   | 82   | 52       | 67         | 61      | 71               | 98                |
| 2      | 31      | 26       | 43    | 19   | 40   | 28       | 34         | 39      | 51               | 68                |
| 3      | 32      | 29       | 39    | 36   | 32   | 24       | 33         | 36      | 51               | 68                |
| 4      | 35      | 38       | 62    | 67   | 45   | 22       | 30         | 28      | 51               | 68                |
| 5      | 23      | 22       | 25    | 34   | 32   | 8        | 20         | 13      | 51               | 68                |
| 6      | 85      | 76       | 57    | 42   | 77   | 61       | 45         | 25      | 78               | 70                |
| 7 (B)  | 27      | 25       | 47    | 62   | 23   | 23       | 24         | 15      | 50               | 46                |
| 8      | 28      | 29       | 31    | 24   | 35   | 20       | 32         | 38      | 43               | 78                |
| 9 (C)  |         |          |       |      |      |          |            |         |                  |                   |
| 10     | 28      | 30       | 30    | 18   | 27   | 20       | 33         | 32      | 42               | 72                |
| 11     | 25      | 24       | 26    | 5    | 27   | 20       | 32         | 27      | 32               | 51                |
| 12     | 21      | 21       | 26    | 29   | 27   | 6        | 20         | 11      | 50               | 78                |
| 13     |         |          |       |      |      |          |            |         |                  |                   |
| 14     | 36      | 37       | 59    | 72   | 40   | 28       | 32         | 25      | 61               | 66                |
| 15     | 46      | 40       | 64    | 32   | 53   | 48       | 52         | 55      | 77               | 85                |
| 16     |         |          |       |      |      |          |            |         |                  |                   |
| 17 (D) | 66      | 77       | 62    | 34   | 45   | 88       | 93         | 83      | 97               | 51                |
| Mean   | 40      | 40       | 45    | 37   | 42   | 32       | 39         | 35      | 58               | 69                |

Table 5: Setting 1: Percentage of simulations correctly identifying MTD. Scenarios 9, 13 and 16 results are not included as there is no stopping rule in Setting 1 implemented to allow for a correct result.

|                 | TITECRM                             | TITECRM2 | ICSDP   | POMM   | nTTP    | TITEBOIN | TITE_mTPI2 | R_mTPI2  |
|-----------------|-------------------------------------|----------|---------|--------|---------|----------|------------|----------|
| <i>Scenario</i> | <i>Mean Duration in Weeks (sd)</i>  |          |         |        |         |          |            |          |
| 1 (A)           | 39 (11)                             | 36 (10)  | 46 (10) | 52 (9) | 32 (5)  | 40 (14)  | 46 (23)    | 50 (26)  |
| 2               | 47 (14)                             | 44 (13)  | 51 (9)  | 54 (8) | 36 (8)  | 48 (14)  | 60 (26)    | 69 (28)  |
| 3               | 57 (11)                             | 56 (13)  | 54 (9)  | 53 (7) | 45 (12) | 55 (12)  | 78 (25)    | 91 (27)  |
| 4               | 61 (9)                              | 62 (9)   | 55 (9)  | 54 (7) | 53 (12) | 59 (11)  | 96 (24)    | 109 (25) |
| 5               | 60 (9)                              | 62 (9)   | 58 (9)  | 58 (8) | 56 (12) | 60 (11)  | 106 (24)   | 121 (25) |
| 6               | 58 (7)                              | 61 (7)   | 58 (8)  | 61 (8) | 55 (9)  | 56 (10)  | 116 (18)   | 132 (20) |
| 7 (B)           | 55 (14)                             | 53 (15)  | 55 (10) | 55 (8) | 44 (14) | 57 (13)  | 81 (31)    | 95 (34)  |
| 8               | 59 (9)                              | 59 (10)  | 55 (9)  | 54 (7) | 49 (11) | 56 (12)  | 85 (25)    | 96 (27)  |
| 9 (C)           | 34 (9)                              | 32 (7)   | 44 (10) | 52 (9) | 31 (4)  | 35 (16)  | 37 (22)    | 37 (23)  |
| 10              | 61 (10)                             | 60 (10)  | 54 (9)  | 53 (7) | 50 (12) | 57 (12)  | 87 (24)    | 100 (26) |
| 11              | 54 (13)                             | 52 (15)  | 54 (9)  | 54 (7) | 42 (12) | 53 (13)  | 73 (27)    | 85 (29)  |
| 12              | 60 (9)                              | 62 (9)   | 58 (9)  | 59 (9) | 56 (12) | 60 (11)  | 108 (24)   | 123 (25) |
| 13              | 57 (8)                              | 59 (7)   | 58 (7)  | 62 (7) | 52 (10) | 50 (7)   | 117 (16)   | 141 (17) |
| 14              | 60 (11)                             | 59 (12)  | 55 (9)  | 54 (7) | 50 (14) | 59 (11)  | 90 (26)    | 106 (28) |
| 15              | 48 (12)                             | 45 (11)  | 51 (8)  | 54 (7) | 37 (8)  | 45 (10)  | 59 (19)    | 70 (22)  |
| 16              | 29 (4)                              | 29 (4)   | 36 (5)  | 44 (5) | 29 (4)  | 22 (6)   | 24 (9)     | 23 (11)  |
| 17 (D)          | 63 (7)                              | 57 (8)   | 57 (5)  | 55 (6) | 56 (10) | 49 (3)   | 85 (7)     | 100 (9)  |
| Mean            | 53                                  | 52       | 53      | 55     | 46      | 51       | 79         | 91       |
| <i>Scenario</i> | <i>Mean Number of Patients (sd)</i> |          |         |        |         |          |            |          |
| 1 (A)           | 14 (6)                              | 12 (5)   | 17 (5)  | 20 (4) | 10 (2)  | 19 (6)   | 15 (5)     | 15 (5)   |
| 2               | 18 (7)                              | 16 (7)   | 20 (5)  | 21 (4) | 12 (4)  | 23 (5)   | 18 (5)     | 18 (6)   |
| 3               | 23 (6)                              | 22 (6)   | 21 (4)  | 21 (3) | 17 (6)  | 26 (4)   | 21 (5)     | 22 (6)   |
| 4               | 25 (5)                              | 25 (5)   | 22 (5)  | 21 (3) | 21 (6)  | 27 (3)   | 24 (4)     | 25 (5)   |
| 5               | 24 (4)                              | 25 (5)   | 23 (5)  | 23 (4) | 22 (6)  | 27 (3)   | 25 (4)     | 27 (4)   |
| 6               | 23 (4)                              | 25 (3)   | 23 (4)  | 25 (4) | 22 (5)  | 26 (3)   | 26 (3)     | 28 (3)   |
| 7 (B)           | 22 (7)                              | 21 (8)   | 22 (5)  | 22 (4) | 16 (7)  | 26 (4)   | 21 (6)     | 23 (7)   |
| 8               | 24 (5)                              | 24 (5)   | 21 (4)  | 21 (3) | 19 (6)  | 26 (4)   | 22 (4)     | 23 (5)   |
| 9 (C)           | 11 (4)                              | 10 (3)   | 16 (5)  | 20 (4) | 10 (2)  | 17 (7)   | 13 (5)     | 12 (5)   |
| 10              | 24 (5)                              | 24 (5)   | 21 (4)  | 21 (3) | 19 (6)  | 27 (3)   | 23 (4)     | 24 (5)   |
| 11              | 21 (7)                              | 20 (7)   | 21 (5)  | 21 (4) | 15 (6)  | 25 (4)   | 20 (5)     | 21 (6)   |
| 12              | 24 (4)                              | 25 (4)   | 23 (5)  | 24 (4) | 22 (6)  | 27 (3)   | 25 (4)     | 27 (4)   |
| 13              | 22 (4)                              | 23 (4)   | 23 (3)  | 25 (3) | 20 (5)  | 25 (2)   | 24 (3)     | 27 (3)   |
| 14              | 24 (6)                              | 24 (6)   | 22 (5)  | 21 (4) | 19 (7)  | 27 (3)   | 23 (5)     | 25 (5)   |
| 15              | 18 (6)                              | 17 (6)   | 20 (4)  | 21 (4) | 13 (4)  | 22 (4)   | 18 (4)     | 18 (5)   |
| 16              | 9 (1)                               | 9 (1)    | 14 (3)  | 17 (2) | 9 (1)   | 11 (3)   | 10 (2)     | 10 (2)   |
| 17 (D)          | 26 (4)                              | 23 (4)   | 23 (3)  | 22 (2) | 23 (5)  | 24 (1)   | 24 (2)     | 25 (2)   |
| Mean            | 21                                  | 20       | 21      | 22     | 17      | 24       | 21         | 22       |

Table 6: Setting 1: Measures of size of the trial across scenarios, mean and sd of duration and number of patients.

|                 | <b>TITECRM</b>                                      | <b>TITECRM2</b> | <b>ICSDP</b> | <b>POMM</b> | <b>nTTP</b> | <b>TITEBOIN</b> | <b>TITE_mTPI2</b> | <b>R_mTPI2</b> |
|-----------------|-----------------------------------------------------|-----------------|--------------|-------------|-------------|-----------------|-------------------|----------------|
| <i>Scenario</i> | <i>Mean Number of Patients on MTD (sd)</i>          |                 |              |             |             |                 |                   |                |
| 1 (A)           | 8 (2)                                               | 9 (1)           | 7 (3)        | 7 (3)       | 8 (2)       | 7 (3)           | 7 (3)             | 8 (2)          |
| 2               | 5 (4)                                               | 4 (4)           | 6 (3)        | 5 (3)       | 4 (4)       | 6 (3)           | 6 (3)             | 6 (3)          |
| 3               | 5 (4)                                               | 5 (4)           | 5 (4)        | 5 (3)       | 4 (4)       | 6 (3)           | 6 (4)             | 6 (3)          |
| 4               | 6 (3)                                               | 6 (3)           | 8 (2)        | 8 (3)       | 6 (4)       | 6 (3)           | 6 (4)             | 6 (3)          |
| 5               | 4 (4)                                               | 4 (4)           | 5 (4)        | 5 (4)       | 4 (4)       | 6 (3)           | 5 (4)             | 5 (4)          |
| 6               | 8 (2)                                               | 7 (3)           | 6 (4)        | 6 (4)       | 7 (3)       | 8 (3)           | 6 (4)             | 5 (4)          |
| 7 (B)           | 4 (4)                                               | 4 (4)           | 6 (3)        | 7 (3)       | 3 (4)       | 6 (3)           | 4 (4)             | 4 (4)          |
| 8               | 5 (3)                                               | 5 (4)           | 4 (4)        | 4 (3)       | 4 (4)       | 6 (3)           | 6 (3)             | 7 (3)          |
| 9 (C)           | NA (NA)                                             | NA (NA)         | NA (NA)      | NA (NA)     | NA (NA)     | NA (NA)         | NA (NA)           | NA (NA)        |
| 10              | 5 (3)                                               | 5 (3)           | 4 (4)        | 4 (3)       | 4 (4)       | 6 (3)           | 6 (3)             | 7 (3)          |
| 11              | 5 (3)                                               | 5 (3)           | 5 (3)        | 4 (2)       | 4 (4)       | 5 (3)           | 6 (3)             | 6 (3)          |
| 12              | 4 (4)                                               | 4 (3)           | 5 (4)        | 5 (4)       | 4 (4)       | 6 (3)           | 5 (4)             | 5 (3)          |
| 13              | NA (NA)                                             | NA (NA)         | NA (NA)      | NA (NA)     | NA (NA)     | NA (NA)         | NA (NA)           | NA (NA)        |
| 14              | 5 (4)                                               | 5 (4)           | 7 (3)        | 8 (3)       | 5 (4)       | 6 (3)           | 5 (4)             | 6 (4)          |
| 15              | 6 (3)                                               | 6 (4)           | 8 (2)        | 6 (3)       | 5 (4)       | 8 (2)           | 7 (3)             | 7 (3)          |
| 16              | NA (NA)                                             | NA (NA)         | NA (NA)      | NA (NA)     | NA (NA)     | NA (NA)         | NA (NA)           | NA (NA)        |
| 17 (D)          | 8 (2)                                               | 8 (3)           | 8 (2)        | 7 (2)       | 7 (3)       | 9 (0)           | 9 (1)             | 9 (1)          |
| Mean            | 6                                                   | 5               | 6            | 6           | 5           | 6               | 6                 | 6              |
| <i>Scenario</i> | <i>Mean Number of Patients on Unsafe Doses (sd)</i> |                 |              |             |             |                 |                   |                |
| 1 (A)           | 5 (7)                                               | 4 (5)           | 10 (6)       | 14 (5)      | 2 (4)       | 13 (8)          | 7 (7)             | 7 (7)          |
| 2               | 6 (7)                                               | 4 (6)           | 8 (6)        | 12 (5)      | 1 (4)       | 12 (8)          | 6 (7)             | 6 (6)          |
| 3               | 8 (6)                                               | 6 (6)           | 8 (5)        | 9 (4)       | 3 (5)       | 11 (7)          | 6 (6)             | 5 (6)          |
| 4               | 8 (5)                                               | 6 (5)           | 5 (5)        | 4 (5)       | 5 (5)       | 9 (6)           | 5 (6)             | 4 (5)          |
| 5               | 6 (4)                                               | 5 (4)           | 4 (4)        | 3 (4)       | 4 (4)       | 6 (4)           | 4 (4)             | 3 (4)          |
| 6               | 0 (0)                                               | 0 (0)           | 0 (0)        | 0 (0)       | 0 (0)       | 0 (0)           | 0 (0)             | 0 (0)          |
| 7 (B)           | 4 (5)                                               | 3 (4)           | 3 (4)        | 3 (4)       | 2 (4)       | 8 (6)           | 4 (5)             | 3 (4)          |
| 8               | 10 (6)                                              | 9 (6)           | 10 (6)       | 10 (5)      | 6 (6)       | 12 (7)          | 7 (7)             | 6 (6)          |
| 9 (C)           | 11 (4)                                              | 10 (3)          | 16 (5)       | 20 (4)      | 10 (2)      | 17 (7)          | 13 (5)            | 12 (5)         |
| 10              | 11 (6)                                              | 9 (6)           | 10 (5)       | 10 (4)      | 7 (6)       | 13 (7)          | 8 (7)             | 8 (6)          |
| 11              | 10 (7)                                              | 8 (7)           | 12 (6)       | 13 (4)      | 5 (6)       | 16 (7)          | 10 (7)            | 10 (7)         |
| 12              | 6 (4)                                               | 5 (4)           | 4 (4)        | 4 (4)       | 5 (4)       | 7 (3)           | 4 (4)             | 3 (4)          |
| 13              | 0 (0)                                               | 0 (0)           | 0 (0)        | 0 (0)       | 0 (0)       | 0 (0)           | 0 (0)             | 0 (0)          |
| 14              | 6 (5)                                               | 4 (5)           | 4 (4)        | 3 (4)       | 3 (4)       | 8 (6)           | 4 (5)             | 4 (4)          |
| 15              | 5 (5)                                               | 4 (4)           | 7 (5)        | 10 (4)      | 1 (3)       | 9 (6)           | 5 (5)             | 5 (5)          |
| 16              | 9 (1)                                               | 9 (1)           | 14 (3)       | 17 (2)      | 9 (1)       | 11 (3)          | 10 (2)            | 10 (2)         |
| 17 (D)          | 10 (3)                                              | 7 (3)           | 8 (2)        | 9 (1)       | 8 (4)       | 9 (1)           | 9 (2)             | 8 (1)          |
| Mean            | 7                                                   | 6               | 7            | 8           | 4           | 10              | 6                 | 5              |

Table 7: Setting 1: Mean and standard deviation of the number of patients assigned to the true MTD and to unsafe doses.

|                              | TITECRM | TITECRM2 | ICSDP | POMM | nTTP | TITEBOIN | TITE_mTPI2 | R_mTPI2 |
|------------------------------|---------|----------|-------|------|------|----------|------------|---------|
| <i>Stopping Reason</i>       |         |          |       |      |      |          |            |         |
| <i>Scenario 1 (A)</i>        |         |          |       |      |      |          |            |         |
| Sufficient Information       | 99      | 100      | 100   | 97   | 100  | 95       | 100        | 99      |
| Lowest Dose Deemed Unsafe    | 0       | 0        | 0     | 0    | 0    | 0        | 0          | 0       |
| Highest Dose Deemed too Safe | 0       | 0        | 0     | 0    | 0    | 0        | 0          | 0       |
| Precision                    | 0       | 0        | 0     | 0    | 0    | 0        | 0          | 0       |
| Hard Safety                  | 0       | 0        | 0     | 0    | 0    | 0        | 0          | 0       |
| Maximum Patients             | 2       | 1        | 2     | 3    | 0    | 10       | 1          | 1       |
| Unsafe (Total)               | 0       | 0        | 0     | 0    | 0    | 0        | 0          | 0       |
| Sufficient/Precision (Total) | 99      | 100      | 100   | 97   | 100  | 95       | 100        | 99      |
| <i>Stopping Reason</i>       |         |          |       |      |      |          |            |         |
| <i>Scenario 2</i>            |         |          |       |      |      |          |            |         |
| Sufficient Information       | 97      | 97       | 99    | 96   | 100  | 89       | 98         | 96      |
| Lowest Dose Deemed Unsafe    | 0       | 0        | 0     | 0    | 0    | 0        | 0          | 0       |
| Highest Dose Deemed too Safe | 0       | 0        | 0     | 0    | 0    | 0        | 0          | 0       |
| Precision                    | 0       | 0        | 0     | 0    | 0    | 0        | 0          | 0       |
| Hard Safety                  | 0       | 0        | 0     | 0    | 0    | 0        | 0          | 0       |
| Maximum Patients             | 7       | 7        | 4     | 4    | 0    | 19       | 4          | 6       |
| Unsafe (Total)               | 0       | 0        | 0     | 0    | 0    | 0        | 0          | 0       |
| Sufficient/Precision (Total) | 97      | 97       | 99    | 96   | 100  | 89       | 98         | 96      |
| <i>Stopping Reason</i>       |         |          |       |      |      |          |            |         |
| <i>Scenario 3</i>            |         |          |       |      |      |          |            |         |
| Sufficient Information       | 91      | 91       | 98    | 97   | 98   | 83       | 97         | 86      |
| Lowest Dose Deemed Unsafe    | 0       | 0        | 0     | 0    | 0    | 0        | 0          | 0       |
| Highest Dose Deemed too Safe | 0       | 0        | 0     | 0    | 0    | 0        | 0          | 0       |
| Precision                    | 0       | 0        | 0     | 0    | 0    | 0        | 0          | 0       |
| Hard Safety                  | 0       | 0        | 0     | 0    | 0    | 0        | 0          | 0       |
| Maximum Patients             | 20      | 20       | 6     | 3    | 1    | 32       | 7          | 19      |
| Unsafe (Total)               | 0       | 0        | 0     | 0    | 0    | 0        | 0          | 0       |
| Sufficient/Precision (Total) | 91      | 91       | 98    | 97   | 98   | 83       | 97         | 86      |
| <i>Stopping Reason</i>       |         |          |       |      |      |          |            |         |
| <i>Scenario 4</i>            |         |          |       |      |      |          |            |         |
| Sufficient Information       | 86      | 86       | 97    | 97   | 95   | 82       | 94         | 73      |
| Lowest Dose Deemed Unsafe    | 0       | 0        | 0     | 0    | 0    | 0        | 0          | 0       |
| Highest Dose Deemed too Safe | 0       | 0        | 0     | 0    | 0    | 0        | 0          | 0       |
| Precision                    | 0       | 0        | 0     | 0    | 0    | 0        | 0          | 0       |
| Hard Safety                  | 0       | 0        | 0     | 0    | 0    | 0        | 0          | 0       |
| Maximum Patients             | 30      | 29       | 9     | 3    | 5    | 43       | 14         | 36      |
| Unsafe (Total)               | 0       | 0        | 0     | 0    | 0    | 0        | 0          | 0       |
| Sufficient/Precision (Total) | 86      | 86       | 97    | 97   | 95   | 82       | 94         | 73      |
| <i>Stopping Reason</i>       |         |          |       |      |      |          |            |         |
| <i>Scenario 5</i>            |         |          |       |      |      |          |            |         |
| Sufficient Information       | 89      | 84       | 95    | 86   | 91   | 85       | 93         | 57      |
| Lowest Dose Deemed Unsafe    | 0       | 0        | 0     | 0    | 0    | 0        | 0          | 0       |
| Highest Dose Deemed too Safe | 0       | 0        | 0     | 0    | 0    | 0        | 0          | 0       |
| Precision                    | 0       | 0        | 0     | 0    | 0    | 0        | 0          | 0       |
| Hard Safety                  | 0       | 0        | 0     | 0    | 0    | 0        | 0          | 0       |
| Maximum Patients             | 24      | 32       | 15    | 14   | 9    | 44       | 21         | 53      |
| Unsafe (Total)               | 0       | 0        | 0     | 0    | 0    | 0        | 0          | 0       |
| Sufficient/Precision (Total) | 89      | 84       | 95    | 86   | 91   | 85       | 93         | 57      |
| <i>Stopping Reason</i>       |         |          |       |      |      |          |            |         |
| <i>Scenario 6</i>            |         |          |       |      |      |          |            |         |
| Sufficient Information       | 95      | 91       | 97    | 79   | 95   | 92       | 93         | 55      |
| Lowest Dose Deemed Unsafe    | 0       | 0        | 0     | 0    | 0    | 0        | 0          | 0       |
| Highest Dose Deemed too Safe | 0       | 0        | 0     | 0    | 0    | 0        | 0          | 0       |
| Precision                    | 0       | 0        | 0     | 0    | 0    | 0        | 0          | 0       |
| Hard Safety                  | 0       | 0        | 0     | 0    | 0    | 0        | 0          | 0       |
| Maximum Patients             | 11      | 20       | 12    | 21   | 5    | 30       | 22         | 52      |
| Unsafe (Total)               | 0       | 0        | 0     | 0    | 0    | 0        | 0          | 0       |
| Sufficient/Precision (Total) | 95      | 91       | 97    | 79   | 95   | 92       | 93         | 55      |

Table 8: Setting 1: Summary of stopping reasons for Setting 1 (Scenarios 1-6), expressed as a percentage of simulations where the given stopping rule was triggered. The sum of these may be greater than 100, since it is possible for more than one rule to be triggered in a single trial.

|                              | TITECRM | TITECRM2 | ICSDP | POMM | nTTP | TITEBOIN | TITE_mTPI2 | R_mTPI2 |
|------------------------------|---------|----------|-------|------|------|----------|------------|---------|
| <i>Stopping Reason</i>       |         |          |       |      |      |          |            |         |
| <i>Scenario 7 (B)</i>        |         |          |       |      |      |          |            |         |
| Sufficient Information       | 90      | 88       | 95    | 95   | 96   | 80       | 95         | 75      |
| Lowest Dose Deemed Unsafe    | 0       | 0        | 0     | 0    | 0    | 0        | 0          | 0       |
| Highest Dose Deemed too Safe | 0       | 0        | 0     | 0    | 0    | 0        | 0          | 0       |
| Precision                    | 0       | 0        | 0     | 0    | 0    | 0        | 0          | 0       |
| Hard Safety                  | 0       | 0        | 0     | 0    | 0    | 0        | 0          | 0       |
| Maximum Patients             | 21      | 22       | 11    | 5    | 4    | 41       | 11         | 32      |
| Unsafe (Total)               | 0       | 0        | 0     | 0    | 0    | 0        | 0          | 0       |
| Sufficient/Precision (Total) | 90      | 88       | 95    | 95   | 96   | 80       | 95         | 75      |
| <i>Stopping Reason</i>       |         |          |       |      |      |          |            |         |
| <i>Scenario 8</i>            |         |          |       |      |      |          |            |         |
| Sufficient Information       | 91      | 89       | 97    | 97   | 97   | 85       | 96         | 83      |
| Lowest Dose Deemed Unsafe    | 0       | 0        | 0     | 0    | 0    | 0        | 0          | 0       |
| Highest Dose Deemed too Safe | 0       | 0        | 0     | 0    | 0    | 0        | 0          | 0       |
| Precision                    | 0       | 0        | 0     | 0    | 0    | 0        | 0          | 0       |
| Hard Safety                  | 0       | 0        | 0     | 0    | 0    | 0        | 0          | 0       |
| Maximum Patients             | 21      | 23       | 8     | 3    | 3    | 33       | 9          | 22      |
| Unsafe (Total)               | 0       | 0        | 0     | 0    | 0    | 0        | 0          | 0       |
| Sufficient/Precision (Total) | 91      | 89       | 97    | 97   | 97   | 85       | 96         | 83      |
| <i>Stopping Reason</i>       |         |          |       |      |      |          |            |         |
| <i>Scenario 9 (C)</i>        |         |          |       |      |      |          |            |         |
| Sufficient Information       | 100     | 100      | 100   | 96   | 100  | 95       | 100        | 100     |
| Lowest Dose Deemed Unsafe    | 0       | 0        | 0     | 0    | 0    | 0        | 0          | 0       |
| Highest Dose Deemed too Safe | 0       | 0        | 0     | 0    | 0    | 0        | 0          | 0       |
| Precision                    | 0       | 0        | 0     | 0    | 0    | 0        | 0          | 0       |
| Hard Safety                  | 0       | 0        | 0     | 0    | 0    | 0        | 0          | 0       |
| Maximum Patients             | 1       | 0        | 1     | 4    | 0    | 8        | 1          | 1       |
| Unsafe (Total)               | 0       | 0        | 0     | 0    | 0    | 0        | 0          | 0       |
| Sufficient/Precision (Total) | 100     | 100      | 100   | 96   | 100  | 95       | 100        | 100     |
| <i>Stopping Reason</i>       |         |          |       |      |      |          |            |         |
| <i>Scenario 10</i>           |         |          |       |      |      |          |            |         |
| Sufficient Information       | 87      | 89       | 98    | 98   | 97   | 82       | 95         | 81      |
| Lowest Dose Deemed Unsafe    | 0       | 0        | 0     | 0    | 0    | 0        | 0          | 0       |
| Highest Dose Deemed too Safe | 0       | 0        | 0     | 0    | 0    | 0        | 0          | 0       |
| Precision                    | 0       | 0        | 0     | 0    | 0    | 0        | 0          | 0       |
| Hard Safety                  | 0       | 0        | 0     | 0    | 0    | 0        | 0          | 0       |
| Maximum Patients             | 26      | 25       | 7     | 2    | 3    | 37       | 10         | 25      |
| Unsafe (Total)               | 0       | 0        | 0     | 0    | 0    | 0        | 0          | 0       |
| Sufficient/Precision (Total) | 87      | 89       | 98    | 98   | 97   | 82       | 95         | 81      |
| <i>Stopping Reason</i>       |         |          |       |      |      |          |            |         |
| <i>Scenario 11</i>           |         |          |       |      |      |          |            |         |
| Sufficient Information       | 93      | 92       | 97    | 96   | 99   | 85       | 97         | 88      |
| Lowest Dose Deemed Unsafe    | 0       | 0        | 0     | 0    | 0    | 0        | 0          | 0       |
| Highest Dose Deemed too Safe | 0       | 0        | 0     | 0    | 0    | 0        | 0          | 0       |
| Precision                    | 0       | 0        | 0     | 0    | 0    | 0        | 0          | 0       |
| Hard Safety                  | 0       | 0        | 0     | 0    | 0    | 0        | 0          | 0       |
| Maximum Patients             | 14      | 17       | 7     | 4    | 1    | 29       | 7          | 16      |
| Unsafe (Total)               | 0       | 0        | 0     | 0    | 0    | 0        | 0          | 0       |
| Sufficient/Precision (Total) | 93      | 92       | 97    | 96   | 99   | 85       | 97         | 88      |
| <i>Stopping Reason</i>       |         |          |       |      |      |          |            |         |
| <i>Scenario 12</i>           |         |          |       |      |      |          |            |         |
| Sufficient Information       | 89      | 83       | 94    | 83   | 90   | 86       | 92         | 54      |
| Lowest Dose Deemed Unsafe    | 0       | 0        | 0     | 0    | 0    | 0        | 0          | 0       |
| Highest Dose Deemed too Safe | 0       | 0        | 0     | 0    | 0    | 0        | 0          | 0       |
| Precision                    | 0       | 0        | 0     | 0    | 0    | 0        | 0          | 0       |
| Hard Safety                  | 0       | 0        | 0     | 0    | 0    | 0        | 0          | 0       |
| Maximum Patients             | 23      | 31       | 16    | 17   | 10   | 46       | 24         | 55      |
| Unsafe (Total)               | 0       | 0        | 0     | 0    | 0    | 0        | 0          | 0       |
| Sufficient/Precision (Total) | 89      | 83       | 94    | 83   | 90   | 86       | 92         | 54      |

Table 9: Setting 1: Summary of stopping reasons for Setting 1 (Scenarios 7-12), expressed as a percentage of simulations where the given stopping rule was triggered. The sum of these may be greater than 100, since it is possible for more than one rule to be triggered in a single trial.



|                              | TITECRM | TITECRM2 | ICSDP | POMM | nTTP | TITEBOIN | TITE_mTPI2 | R_mTPI2 |
|------------------------------|---------|----------|-------|------|------|----------|------------|---------|
| <i>Stopping Reason</i>       |         |          |       |      |      |          |            |         |
| <i>Scenario 13</i>           |         |          |       |      |      |          |            |         |
| Sufficient Information       | 95      | 96       | 97    | 80   | 98   | 98       | 94         | 63      |
| Lowest Dose Deemed Unsafe    | 0       | 0        | 0     | 0    | 0    | 0        | 0          | 0       |
| Highest Dose Deemed too Safe | 0       | 0        | 0     | 0    | 0    | 0        | 0          | 0       |
| Precision                    | 0       | 0        | 0     | 0    | 0    | 0        | 0          | 0       |
| Hard Safety                  | 0       | 0        | 0     | 0    | 0    | 0        | 0          | 0       |
| Maximum Patients             | 8       | 8        | 8     | 20   | 2    | 8        | 10         | 46      |
| Unsafe (Total)               | 0       | 0        | 0     | 0    | 0    | 0        | 0          | 0       |
| Sufficient/Precision (Total) | 95      | 96       | 97    | 80   | 98   | 98       | 94         | 63      |
| <i>Stopping Reason</i>       |         |          |       |      |      |          |            |         |
| <i>Scenario 14</i>           |         |          |       |      |      |          |            |         |
| Sufficient Information       | 87      | 85       | 96    | 97   | 95   | 80       | 94         | 73      |
| Lowest Dose Deemed Unsafe    | 0       | 0        | 0     | 0    | 0    | 0        | 0          | 0       |
| Highest Dose Deemed too Safe | 0       | 0        | 0     | 0    | 0    | 0        | 0          | 0       |
| Precision                    | 0       | 0        | 0     | 0    | 0    | 0        | 0          | 0       |
| Hard Safety                  | 0       | 0        | 0     | 0    | 0    | 0        | 0          | 0       |
| Maximum Patients             | 28      | 28       | 9     | 3    | 5    | 42       | 13         | 37      |
| Unsafe (Total)               | 0       | 0        | 0     | 0    | 0    | 0        | 0          | 0       |
| Sufficient/Precision (Total) | 87      | 85       | 96    | 97   | 95   | 80       | 94         | 73      |
| <i>Stopping Reason</i>       |         |          |       |      |      |          |            |         |
| <i>Scenario 15</i>           |         |          |       |      |      |          |            |         |
| Sufficient Information       | 99      | 99       | 100   | 98   | 100  | 97       | 100        | 99      |
| Lowest Dose Deemed Unsafe    | 0       | 0        | 0     | 0    | 0    | 0        | 0          | 0       |
| Highest Dose Deemed too Safe | 0       | 0        | 0     | 0    | 0    | 0        | 0          | 0       |
| Precision                    | 0       | 0        | 0     | 0    | 0    | 0        | 0          | 0       |
| Hard Safety                  | 0       | 0        | 0     | 0    | 0    | 0        | 0          | 0       |
| Maximum Patients             | 3       | 3        | 2     | 2    | 0    | 9        | 2          | 2       |
| Unsafe (Total)               | 0       | 0        | 0     | 0    | 0    | 0        | 0          | 0       |
| Sufficient/Precision (Total) | 99      | 99       | 100   | 98   | 100  | 97       | 100        | 99      |
| <i>Stopping Reason</i>       |         |          |       |      |      |          |            |         |
| <i>Scenario 16</i>           |         |          |       |      |      |          |            |         |
| Sufficient Information       | 100     | 100      | 100   | 100  | 100  | 100      | 100        | 100     |
| Lowest Dose Deemed Unsafe    | 0       | 0        | 0     | 0    | 0    | 0        | 0          | 0       |
| Highest Dose Deemed too Safe | 0       | 0        | 0     | 0    | 0    | 0        | 0          | 0       |
| Precision                    | 0       | 0        | 0     | 0    | 0    | 0        | 0          | 0       |
| Hard Safety                  | 0       | 0        | 0     | 0    | 0    | 0        | 0          | 0       |
| Maximum Patients             | 0       | 0        | 0     | 0    | 0    | 0        | 0          | 0       |
| Unsafe (Total)               | 0       | 0        | 0     | 0    | 0    | 0        | 0          | 0       |
| Sufficient/Precision (Total) | 100     | 100      | 100   | 100  | 100  | 100      | 100        | 100     |
| <i>Stopping Reason</i>       |         |          |       |      |      |          |            |         |
| <i>Scenario 17 (D)</i>       |         |          |       |      |      |          |            |         |
| Sufficient Information       | 89      | 94       | 100   | 99   | 96   | 99       | 99         | 99      |
| Lowest Dose Deemed Unsafe    | 0       | 0        | 0     | 0    | 0    | 0        | 0          | 0       |
| Highest Dose Deemed too Safe | 0       | 0        | 0     | 0    | 0    | 0        | 0          | 0       |
| Precision                    | 0       | 0        | 0     | 0    | 0    | 0        | 0          | 0       |
| Hard Safety                  | 0       | 0        | 0     | 0    | 0    | 0        | 0          | 0       |
| Maximum Patients             | 32      | 16       | 2     | 1    | 4    | 2        | 2          | 5       |
| Unsafe (Total)               | 0       | 0        | 0     | 0    | 0    | 0        | 0          | 0       |
| Sufficient/Precision (Total) | 89      | 94       | 100   | 99   | 96   | 99       | 99         | 99      |

Table 10: Setting 1: Summary of stopping reasons for Setting 1 (Scenarios 13-17), expressed as a percentage of simulations where the given stopping rule was triggered. The sum of these may be greater than 100, since it is possible for more than one rule to be triggered in a single trial.

|        | TITECRM | TITECRM2 | ICSDP | POMM | nTTP | TITEBOIN | TITE_mTPI2 | R_mTPI2 | Benchmark P(DLT) | Benchmark E(nTTP) |
|--------|---------|----------|-------|------|------|----------|------------|---------|------------------|-------------------|
| 1 (A)  | 38      | 38       | 49    | 34   | 57   | 29       | 39         | 35      | 71               | 98                |
| 2      | 30      | 25       | 41    | 22   | 37   | 27       | 34         | 38      | 51               | 68                |
| 3      | 28      | 29       | 39    | 26   | 29   | 25       | 32         | 35      | 51               | 68                |
| 4      | 24      | 37       | 56    | 54   | 30   | 22       | 30         | 28      | 51               | 68                |
| 5      | 20      | 21       | 23    | 48   | 22   | 15       | 22         | 13      | 51               | 68                |
| 6      | 79      | 27       | 51    | 11   | 18   | 29       | 19         | 12      | 78               | 70                |
| 7 (B)  | 23      | 24       | 44    | 54   | 13   | 23       | 24         | 16      | 50               | 46                |
| 8      | 23      | 28       | 32    | 17   | 36   | 20       | 32         | 36      | 43               | 78                |
| 9 (C)  | 63      | 73       | 29    | 50   | 72   | 48       | 51         | 53      |                  |                   |
| 10     | 29      | 31       | 34    | 17   | 34   | 21       | 33         | 34      | 42               | 72                |
| 11     | 26      | 25       | 28    | 15   | 30   | 21       | 33         | 30      | 32               | 51                |
| 12     | 24      | 21       | 26    | 50   | 21   | 16       | 23         | 12      | 50               | 78                |
| 13     | 36      | 77       | 28    | 37   | 59   | 79       | 72         | 71      |                  |                   |
| 14     | 35      | 35       | 55    | 58   | 23   | 27       | 32         | 26      | 61               | 66                |
| 15     | 44      | 40       | 59    | 40   | 46   | 49       | 51         | 54      | 77               | 85                |
| 16     | 85      | 96       | 66    | 89   | 96   | 80       | 80         | 81      |                  |                   |
| 17 (D) | 83      | 82       | 97    | 62   | 64   | 97       | 97         | 97      | 97               | 51                |
| Mean   | 41      | 42       | 45    | 40   | 40   | 37       | 41         | 39      |                  |                   |

Table 11: Setting 2: Percentage of simulations correctly identifying MTD.

|                 | TITECRM                             | TITECRM2 | ICS DP  | POMM    | nTTP   | TITEBOIN | TITE_mTPI2 | R_mTPI2  |
|-----------------|-------------------------------------|----------|---------|---------|--------|----------|------------|----------|
| <i>Scenario</i> | <i>Mean Duration in Weeks (sd)</i>  |          |         |         |        |          |            |          |
| 1 (A)           | 39 (13)                             | 31 (13)  | 44 (12) | 44 (13) | 29 (4) | 33 (18)  | 41 (26)    | 43 (30)  |
| 2               | 48 (13)                             | 42 (15)  | 50 (10) | 47 (11) | 30 (3) | 42 (18)  | 57 (28)    | 63 (33)  |
| 3               | 54 (11)                             | 53 (13)  | 52 (9)  | 44 (8)  | 31 (4) | 50 (15)  | 76 (26)    | 88 (30)  |
| 4               | 51 (11)                             | 57 (11)  | 52 (9)  | 42 (6)  | 32 (5) | 55 (13)  | 93 (23)    | 107 (26) |
| 5               | 47 (9)                              | 57 (11)  | 55 (10) | 43 (7)  | 34 (6) | 54 (14)  | 101 (23)   | 117 (25) |
| 6               | 44 (7)                              | 55 (9)   | 56 (9)  | 43 (6)  | 35 (5) | 50 (13)  | 108 (18)   | 122 (20) |
| 7 (B)           | 52 (12)                             | 50 (16)  | 53 (10) | 45 (9)  | 32 (6) | 51 (17)  | 78 (32)    | 90 (38)  |
| 8               | 53 (11)                             | 56 (11)  | 52 (9)  | 43 (7)  | 32 (4) | 52 (14)  | 83 (24)    | 94 (27)  |
| 9 (C)           | 32 (13)                             | 25 (11)  | 38 (14) | 39 (15) | 27 (5) | 27 (19)  | 32 (25)    | 29 (27)  |
| 10              | 60 (10)                             | 56 (11)  | 52 (9)  | 42 (7)  | 32 (4) | 53 (13)  | 85 (24)    | 98 (27)  |
| 11              | 53 (13)                             | 49 (16)  | 53 (9)  | 46 (9)  | 31 (5) | 48 (17)  | 70 (29)    | 80 (33)  |
| 12              | 58 (10)                             | 57 (11)  | 56 (10) | 43 (7)  | 34 (6) | 54 (14)  | 102 (24)   | 118 (26) |
| 13              | 51 (8)                              | 51 (9)   | 57 (7)  | 47 (8)  | 36 (6) | 41 (10)  | 102 (18)   | 115 (21) |
| 14              | 59 (12)                             | 55 (14)  | 52 (10) | 43 (7)  | 33 (6) | 54 (15)  | 87 (27)    | 102 (31) |
| 15              | 47 (12)                             | 43 (13)  | 50 (9)  | 48 (10) | 30 (3) | 40 (14)  | 56 (21)    | 65 (26)  |
| 16              | 22 (9)                              | 18 (7)   | 25 (11) | 22 (9)  | 23 (4) | 13 (8)   | 16 (13)    | 14 (13)  |
| 17 (D)          | 57 (9)                              | 50 (10)  | 49 (5)  | 36 (7)  | 29 (5) | 40 (7)   | 76 (10)    | 92 (12)  |
| Mean            | 49                                  | 48       | 50      | 42      | 31     | 44       | 74         | 84       |
| <i>Scenario</i> | <i>Mean Number of Patients (sd)</i> |          |         |         |        |          |            |          |
| 1 (A)           | 14 (6)                              | 10 (6)   | 16 (6)  | 17 (6)  | 9 (2)  | 16 (8)   | 13 (7)     | 12 (7)   |
| 2               | 18 (6)                              | 15 (8)   | 19 (5)  | 18 (5)  | 9 (2)  | 20 (8)   | 17 (7)     | 17 (7)   |
| 3               | 21 (6)                              | 21 (7)   | 20 (4)  | 16 (4)  | 10 (2) | 24 (6)   | 20 (5)     | 21 (6)   |
| 4               | 20 (5)                              | 23 (5)   | 20 (4)  | 15 (3)  | 10 (3) | 25 (4)   | 23 (4)     | 25 (5)   |
| 5               | 18 (5)                              | 23 (5)   | 22 (5)  | 16 (3)  | 11 (3) | 25 (5)   | 24 (4)     | 26 (5)   |
| 6               | 16 (4)                              | 22 (5)   | 22 (4)  | 16 (3)  | 11 (3) | 24 (5)   | 24 (4)     | 26 (4)   |
| 7 (B)           | 20 (6)                              | 19 (8)   | 21 (5)  | 17 (4)  | 10 (3) | 24 (7)   | 20 (7)     | 22 (8)   |
| 8               | 21 (5)                              | 22 (5)   | 20 (4)  | 16 (3)  | 10 (2) | 24 (5)   | 21 (4)     | 22 (5)   |
| 9 (C)           | 11 (6)                              | 8 (5)    | 14 (6)  | 14 (7)  | 8 (2)  | 13 (9)   | 10 (7)     | 9 (6)    |
| 10              | 24 (5)                              | 23 (5)   | 20 (4)  | 15 (3)  | 10 (2) | 25 (5)   | 22 (4)     | 23 (5)   |
| 11              | 21 (7)                              | 19 (8)   | 21 (5)  | 17 (4)  | 10 (2) | 23 (7)   | 19 (6)     | 20 (7)   |
| 12              | 23 (5)                              | 23 (5)   | 22 (5)  | 16 (3)  | 11 (3) | 25 (5)   | 24 (5)     | 26 (5)   |
| 13              | 19 (4)                              | 19 (5)   | 23 (3)  | 17 (4)  | 12 (3) | 20 (4)   | 21 (4)     | 24 (5)   |
| 14              | 24 (6)                              | 22 (7)   | 21 (5)  | 16 (3)  | 11 (3) | 25 (5)   | 22 (5)     | 24 (6)   |
| 15              | 18 (6)                              | 16 (6)   | 19 (4)  | 18 (5)  | 9 (1)  | 19 (6)   | 17 (5)     | 17 (6)   |
| 16              | 7 (2)                               | 5 (2)    | 9 (4)   | 8 (3)   | 7 (1)  | 6 (4)    | 6 (4)      | 5 (3)    |
| 17 (D)          | 23 (5)                              | 20 (4)   | 19 (3)  | 13 (3)  | 10 (2) | 20 (3)   | 20 (3)     | 21 (3)   |
| Mean            | 19                                  | 18       | 19      | 16      | 10     | 21       | 19         | 20       |

Table 12: Setting 2: Measures of size of the trial across scenarios, mean and sd of duration and number of patients.

|                 | TITECRM                                             | TITECRM2 | ICSDP   | POMM    | nTTP    | TITEBOIN | TITE_mTPI2 | R_mTPI2 |
|-----------------|-----------------------------------------------------|----------|---------|---------|---------|----------|------------|---------|
| <i>Scenario</i> | <i>Mean Number of Patients on MTD (sd)</i>          |          |         |         |         |          |            |         |
| 1 (A)           | 7 (2)                                               | 7 (3)    | 7 (3)   | 6 (3)   | 7 (2)   | 5 (3)    | 6 (3)      | 6 (3)   |
| 2               | 6 (3)                                               | 4 (4)    | 6 (3)   | 5 (3)   | 3 (3)   | 6 (3)    | 5 (4)      | 6 (4)   |
| 3               | 5 (3)                                               | 4 (4)    | 5 (4)   | 4 (3)   | 1 (1)   | 6 (3)    | 5 (4)      | 6 (3)   |
| 4               | 5 (3)                                               | 5 (3)    | 7 (3)   | 4 (2)   | 2 (2)   | 6 (3)    | 5 (3)      | 6 (3)   |
| 5               | 2 (3)                                               | 3 (3)    | 4 (3)   | 2 (2)   | 0 (1)   | 6 (3)    | 5 (4)      | 5 (4)   |
| 6               | 2 (2)                                               | 5 (3)    | 6 (4)   | 1 (2)   | 2 (2)   | 6 (3)    | 4 (4)      | 4 (3)   |
| 7 (B)           | 4 (4)                                               | 3 (4)    | 6 (3)   | 4 (3)   | 1 (1)   | 5 (3)    | 4 (4)      | 4 (4)   |
| 8               | 5 (3)                                               | 5 (3)    | 4 (4)   | 3 (2)   | 1 (1)   | 5 (3)    | 6 (3)      | 7 (3)   |
| 9 (C)           | NA (NA)                                             | NA (NA)  | NA (NA) | NA (NA) | NA (NA) | NA (NA)  | NA (NA)    | NA (NA) |
| 10              | 5 (3)                                               | 5 (3)    | 4 (4)   | 3 (2)   | 1 (1)   | 5 (3)    | 6 (3)      | 6 (3)   |
| 11              | 5 (3)                                               | 5 (3)    | 5 (3)   | 4 (2)   | 3 (3)   | 5 (3)    | 6 (3)      | 6 (3)   |
| 12              | 4 (4)                                               | 3 (3)    | 4 (3)   | 2 (2)   | 0 (1)   | 6 (3)    | 5 (4)      | 5 (3)   |
| 13              | NA (NA)                                             | NA (NA)  | NA (NA) | NA (NA) | NA (NA) | NA (NA)  | NA (NA)    | NA (NA) |
| 14              | 5 (4)                                               | 5 (3)    | 7 (3)   | 4 (3)   | 1 (2)   | 6 (3)    | 5 (4)      | 6 (4)   |
| 15              | 6 (3)                                               | 5 (4)    | 7 (3)   | 6 (3)   | 3 (3)   | 7 (3)    | 7 (3)      | 7 (3)   |
| 16              | NA (NA)                                             | NA (NA)  | NA (NA) | NA (NA) | NA (NA) | NA (NA)  | NA (NA)    | NA (NA) |
| 17 (D)          | 9 (2)                                               | 7 (3)    | 7 (3)   | 4 (2)   | 1 (1)   | 9 (1)    | 9 (1)      | 9 (1)   |
| Mean            | 5                                                   | 5        | 6       | 4       | 2       | 6        | 6          | 6       |
| <i>Scenario</i> | <i>Mean Number of Patients on Unsafe Doses (sd)</i> |          |         |         |         |          |            |         |
| 1 (A)           | 7 (6)                                               | 4 (5)    | 10 (7)  | 10 (6)  | 2 (3)   | 11 (8)   | 7 (7)      | 6 (6)   |
| 2               | 6 (6)                                               | 4 (6)    | 8 (6)   | 8 (4)   | 0 (1)   | 10 (8)   | 6 (7)      | 5 (6)   |
| 3               | 6 (5)                                               | 6 (5)    | 7 (5)   | 5 (3)   | 1 (2)   | 10 (7)   | 5 (6)      | 5 (6)   |
| 4               | 4 (4)                                               | 5 (5)    | 4 (5)   | 2 (3)   | 1 (1)   | 8 (6)    | 5 (5)      | 4 (5)   |
| 5               | 2 (2)                                               | 4 (3)    | 4 (4)   | 1 (2)   | 1 (2)   | 5 (3)    | 3 (3)      | 2 (3)   |
| 6               | 0 (0)                                               | 0 (0)    | 0 (0)   | 0 (0)   | 0 (0)   | 0 (0)    | 0 (0)      | 0 (0)   |
| 7 (B)           | 2 (3)                                               | 3 (4)    | 3 (4)   | 2 (3)   | 0 (1)   | 7 (6)    | 3 (5)      | 2 (4)   |
| 8               | 8 (5)                                               | 8 (6)    | 9 (5)   | 6 (3)   | 1 (2)   | 11 (7)   | 7 (7)      | 6 (6)   |
| 9 (C)           | 11 (6)                                              | 8 (5)    | 14 (6)  | 14 (7)  | 8 (2)   | 13 (9)   | 10 (7)     | 9 (6)   |
| 10              | 11 (6)                                              | 8 (5)    | 9 (5)   | 6 (3)   | 2 (2)   | 12 (7)   | 8 (7)      | 7 (6)   |
| 11              | 10 (7)                                              | 8 (7)    | 11 (5)  | 9 (4)   | 1 (2)   | 14 (7)   | 9 (7)      | 9 (7)   |
| 12              | 5 (4)                                               | 4 (3)    | 4 (4)   | 1 (2)   | 1 (2)   | 5 (3)    | 3 (3)      | 3 (3)   |
| 13              | 0 (0)                                               | 0 (0)    | 0 (0)   | 0 (0)   | 0 (0)   | 0 (0)    | 0 (0)      | 0 (0)   |
| 14              | 5 (5)                                               | 4 (4)    | 4 (4)   | 2 (2)   | 1 (1)   | 7 (6)    | 4 (5)      | 3 (4)   |
| 15              | 5 (5)                                               | 3 (4)    | 7 (4)   | 7 (4)   | 0 (1)   | 8 (6)    | 5 (5)      | 4 (5)   |
| 16              | 7 (2)                                               | 5 (2)    | 9 (4)   | 8 (3)   | 7 (1)   | 6 (4)    | 6 (4)      | 5 (3)   |
| 17 (D)          | 7 (4)                                               | 5 (2)    | 5 (2)   | 3 (1)   | 2 (1)   | 5 (3)    | 5 (2)      | 5 (2)   |
| Mean            | 6                                                   | 5        | 6       | 5       | 2       | 8        | 5          | 4       |

Table 13: Setting 2: Mean and standard deviation of the number of patients assigned to the true MTD and to unsafe doses.

|                              | TITECRM               | TITECRM2 | ICSDP | POMM | nTTP | TITEBOIN | TITE_mTPI2 | R_mTPI2 |
|------------------------------|-----------------------|----------|-------|------|------|----------|------------|---------|
| <i>Stopping Reason</i>       | <i>Scenario 1 (A)</i> |          |       |      |      |          |            |         |
| Sufficient Information       | 57                    | 46       | 88    | 60   | 46   | 68       | 70         | 68      |
| Lowest Dose Deemed Unsafe    | 42                    | 50       | 11    | 20   | 22   | 28       | 30         | 32      |
| Highest Dose Deemed too Safe | 0                     | 0        | 0     | 0    | 0    | 0        | 0          | 0       |
| Precision                    | 0                     | 17       | 2     | 14   | 73   | 0        | 0          | 0       |
| Hard Safety                  | 10                    | 4        | 11    | 14   | 10   | 3        | 4          | 4       |
| Maximum Patients             | 2                     | 1        | 1     | 2    | 0    | 7        | 1          | 1       |
| Unsafe (Total)               | 42                    | 50       | 11    | 26   | 25   | 28       | 30         | 32      |
| Sufficient/Precision (Total) | 58                    | 50       | 89    | 71   | 75   | 68       | 70         | 68      |
| <i>Stopping Reason</i>       | <i>Scenario 2</i>     |          |       |      |      |          |            |         |
| Sufficient Information       | 78                    | 68       | 91    | 57   | 43   | 80       | 86         | 82      |
| Lowest Dose Deemed Unsafe    | 16                    | 23       | 2     | 5    | 3    | 12       | 13         | 15      |
| Highest Dose Deemed too Safe | 0                     | 0        | 0     | 0    | 0    | 0        | 0          | 0       |
| Precision                    | 4                     | 15       | 9     | 42   | 92   | 0        | 0          | 0       |
| Hard Safety                  | 2                     | 1        | 2     | 4    | 2    | 1        | 1          | 1       |
| Maximum Patients             | 6                     | 5        | 3     | 2    | 0    | 15       | 3          | 5       |
| Unsafe (Total)               | 16                    | 23       | 2     | 7    | 5    | 12       | 13         | 15      |
| Sufficient/Precision (Total) | 82                    | 75       | 97    | 91   | 95   | 80       | 86         | 82      |
| <i>Stopping Reason</i>       | <i>Scenario 3</i>     |          |       |      |      |          |            |         |
| Sufficient Information       | 75                    | 73       | 82    | 34   | 20   | 82       | 94         | 83      |
| Lowest Dose Deemed Unsafe    | 2                     | 5        | 0     | 0    | 0    | 3        | 3          | 3       |
| Highest Dose Deemed too Safe | 0                     | 1        | 0     | 0    | 0    | 2        | 0          | 0       |
| Precision                    | 23                    | 22       | 25    | 78   | 99   | 0        | 0          | 0       |
| Hard Safety                  | 0                     | 0        | 0     | 0    | 0    | 0        | 0          | 0       |
| Maximum Patients             | 11                    | 15       | 4     | 1    | 0    | 25       | 6          | 17      |
| Unsafe (Total)               | 2                     | 5        | 0     | 1    | 1    | 3        | 3          | 3       |
| Sufficient/Precision (Total) | 94                    | 87       | 98    | 99   | 99   | 82       | 94         | 83      |
| <i>Stopping Reason</i>       | <i>Scenario 4</i>     |          |       |      |      |          |            |         |
| Sufficient Information       | 44                    | 58       | 71    | 17   | 9    | 78       | 91         | 72      |
| Lowest Dose Deemed Unsafe    | 0                     | 1        | 0     | 0    | 0    | 1        | 1          | 1       |
| Highest Dose Deemed too Safe | 0                     | 6        | 0     | 0    | 1    | 7        | 4          | 2       |
| Precision                    | 61                    | 36       | 39    | 92   | 99   | 0        | 0          | 0       |
| Hard Safety                  | 0                     | 0        | 0     | 0    | 0    | 0        | 0          | 0       |
| Maximum Patients             | 7                     | 17       | 6     | 0    | 0    | 32       | 11         | 32      |
| Unsafe (Total)               | 0                     | 1        | 0     | 0    | 0    | 1        | 1          | 1       |
| Sufficient/Precision (Total) | 98                    | 85       | 97    | 100  | 100  | 78       | 91         | 72      |
| <i>Stopping Reason</i>       | <i>Scenario 5</i>     |          |       |      |      |          |            |         |
| Sufficient Information       | 22                    | 49       | 73    | 14   | 9    | 69       | 82         | 55      |
| Lowest Dose Deemed Unsafe    | 0                     | 1        | 0     | 0    | 0    | 1        | 1          | 1       |
| Highest Dose Deemed too Safe | 2                     | 19       | 1     | 1    | 5    | 20       | 12         | 9       |
| Precision                    | 83                    | 26       | 31    | 92   | 97   | 0        | 0          | 0       |
| Hard Safety                  | 0                     | 0        | 0     | 0    | 0    | 0        | 0          | 0       |
| Maximum Patients             | 2                     | 20       | 11    | 1    | 0    | 31       | 15         | 44      |
| Unsafe (Total)               | 0                     | 1        | 0     | 0    | 0    | 1        | 1          | 1       |
| Sufficient/Precision (Total) | 100                   | 69       | 95    | 99   | 97   | 69       | 82         | 55      |
| <i>Stopping Reason</i>       | <i>Scenario 6</i>     |          |       |      |      |          |            |         |
| Sufficient Information       | 7                     | 37       | 78    | 8    | 3    | 57       | 66         | 41      |
| Lowest Dose Deemed Unsafe    | 0                     | 0        | 0     | 0    | 0    | 0        | 0          | 0       |
| Highest Dose Deemed too Safe | 8                     | 45       | 3     | 4    | 26   | 37       | 30         | 29      |
| Precision                    | 95                    | 17       | 22    | 93   | 85   | 0        | 0          | 0       |
| Hard Safety                  | 0                     | 0        | 0     | 0    | 0    | 0        | 0          | 0       |
| Maximum Patients             | 0                     | 11       | 9     | 0    | 0    | 21       | 15         | 38      |
| Unsafe (Total)               | 0                     | 0        | 0     | 0    | 0    | 0        | 0          | 0       |
| Sufficient/Precision (Total) | 100                   | 50       | 94    | 96   | 85   | 57       | 66         | 41      |

Table 14: Setting 2: Summary of stopping reasons for Setting 2 (Scenarios 1-6), expressed as a percentage of simulations where the given stopping rule was triggered. The sum of these may be greater than 100, since it is possible for more than one rule to be triggered in a single trial.

|                              | TITECRM | TITECRM2 | ICSDP | POMM | nTTP | TITEBOIN | TITE_mTPI2 | R_mTPI2 |
|------------------------------|---------|----------|-------|------|------|----------|------------|---------|
| <i>Stopping Reason</i>       |         |          |       |      |      |          |            |         |
| <i>Scenario 7 (B)</i>        |         |          |       |      |      |          |            |         |
| Sufficient Information       | 65      | 65       | 83    | 35   | 32   | 77       | 89         | 70      |
| Lowest Dose Deemed Unsafe    | 4       | 11       | 1     | 1    | 1    | 6        | 6          | 8       |
| Highest Dose Deemed too Safe | 0       | 1        | 0     | 0    | 0    | 2        | 1          | 1       |
| Precision                    | 34      | 21       | 21    | 72   | 96   | 0        | 0          | 0       |
| Hard Safety                  | 1       | 0        | 1     | 1    | 1    | 0        | 0          | 0       |
| Maximum Patients             | 7       | 17       | 9     | 2    | 0    | 29       | 8          | 27      |
| Unsafe (Total)               | 4       | 11       | 1     | 2    | 1    | 6        | 6          | 8       |
| Sufficient/Precision (Total) | 94      | 79       | 95    | 97   | 98   | 77       | 89         | 70      |
| <i>Stopping Reason</i>       |         |          |       |      |      |          |            |         |
| <i>Scenario 8</i>            |         |          |       |      |      |          |            |         |
| Sufficient Information       | 59      | 70       | 78    | 26   | 9    | 79       | 93         | 82      |
| Lowest Dose Deemed Unsafe    | 0       | 1        | 0     | 0    | 0    | 1        | 1          | 1       |
| Highest Dose Deemed too Safe | 0       | 6        | 0     | 0    | 1    | 8        | 3          | 1       |
| Precision                    | 42      | 24       | 31    | 86   | 100  | 0        | 0          | 0       |
| Hard Safety                  | 0       | 0        | 0     | 0    | 0    | 0        | 0          | 0       |
| Maximum Patients             | 8       | 16       | 6     | 0    | 0    | 26       | 8          | 20      |
| Unsafe (Total)               | 0       | 1        | 0     | 0    | 0    | 1        | 1          | 1       |
| Sufficient/Precision (Total) | 97      | 86       | 98    | 99   | 100  | 79       | 93         | 82      |
| <i>Stopping Reason</i>       |         |          |       |      |      |          |            |         |
| <i>Scenario 9 (C)</i>        |         |          |       |      |      |          |            |         |
| Sufficient Information       | 37      | 24       | 70    | 42   | 20   | 49       | 49         | 47      |
| Lowest Dose Deemed Unsafe    | 63      | 73       | 29    | 38   | 71   | 48       | 51         | 53      |
| Highest Dose Deemed too Safe | 0       | 0        | 0     | 0    | 0    | 0        | 0          | 0       |
| Precision                    | 0       | 19       | 1     | 6    | 32   | 0        | 0          | 0       |
| Hard Safety                  | 24      | 10       | 29    | 30   | 21   | 9        | 10         | 10      |
| Maximum Patients             | 1       | 0        | 1     | 2    | 0    | 6        | 1          | 0       |
| Unsafe (Total)               | 63      | 73       | 29    | 50   | 72   | 48       | 51         | 53      |
| Sufficient/Precision (Total) | 37      | 27       | 71    | 48   | 28   | 49       | 49         | 47      |
| <i>Stopping Reason</i>       |         |          |       |      |      |          |            |         |
| <i>Scenario 10</i>           |         |          |       |      |      |          |            |         |
| Sufficient Information       | 85      | 68       | 76    | 23   | 9    | 81       | 93         | 81      |
| Lowest Dose Deemed Unsafe    | 1       | 1        | 0     | 0    | 0    | 1        | 1          | 1       |
| Highest Dose Deemed too Safe | 1       | 3        | 0     | 0    | 0    | 4        | 2          | 1       |
| Precision                    | 4       | 30       | 35    | 88   | 99   | 0        | 0          | 0       |
| Hard Safety                  | 0       | 0        | 0     | 0    | 0    | 0        | 0          | 0       |
| Maximum Patients             | 25      | 16       | 4     | 0    | 0    | 29       | 9          | 23      |
| Unsafe (Total)               | 1       | 1        | 0     | 0    | 0    | 1        | 1          | 1       |
| Sufficient/Precision (Total) | 88      | 89       | 98    | 100  | 100  | 81       | 93         | 81      |
| <i>Stopping Reason</i>       |         |          |       |      |      |          |            |         |
| <i>Scenario 11</i>           |         |          |       |      |      |          |            |         |
| Sufficient Information       | 89      | 71       | 86    | 42   | 33   | 78       | 90         | 81      |
| Lowest Dose Deemed Unsafe    | 4       | 11       | 1     | 1    | 1    | 6        | 6          | 8       |
| Highest Dose Deemed too Safe | 0       | 2        | 0     | 0    | 0    | 4        | 1          | 0       |
| Precision                    | 1       | 16       | 18    | 66   | 97   | 0        | 0          | 0       |
| Hard Safety                  | 1       | 0        | 1     | 1    | 1    | 0        | 0          | 0       |
| Maximum Patients             | 14      | 13       | 6     | 2    | 0    | 22       | 6          | 13      |
| Unsafe (Total)               | 4       | 11       | 1     | 2    | 1    | 6        | 6          | 8       |
| Sufficient/Precision (Total) | 90      | 81       | 97    | 96   | 98   | 78       | 90         | 81      |
| <i>Stopping Reason</i>       |         |          |       |      |      |          |            |         |
| <i>Scenario 12</i>           |         |          |       |      |      |          |            |         |
| Sufficient Information       | 71      | 48       | 75    | 14   | 9    | 69       | 80         | 51      |
| Lowest Dose Deemed Unsafe    | 0       | 1        | 0     | 0    | 0    | 1        | 1          | 1       |
| Highest Dose Deemed too Safe | 8       | 21       | 1     | 1    | 6    | 21       | 14         | 11      |
| Precision                    | 28      | 24       | 28    | 91   | 97   | 0        | 0          | 0       |
| Hard Safety                  | 0       | 0        | 0     | 0    | 0    | 0        | 0          | 0       |
| Maximum Patients             | 20      | 21       | 12    | 1    | 0    | 31       | 17         | 46      |
| Unsafe (Total)               | 0       | 1        | 0     | 0    | 0    | 1        | 1          | 1       |
| Sufficient/Precision (Total) | 92      | 67       | 95    | 98   | 97   | 69       | 80         | 51      |

Table 15: Setting 2: Summary of stopping reasons for Setting 2 (Scenarios 7-12), expressed as a percentage of simulations where the given stopping rule was triggered. The sum of these may be greater than 100, since it is possible for more than one rule to be triggered in a single trial.

|                              | TITECRM | TITECRM2 | ICSDP | POMM | nTTP | TITEBOIN | TITE_mTPI2 | R_mTPI2 |
|------------------------------|---------|----------|-------|------|------|----------|------------|---------|
| <i>Stopping Reason</i>       |         |          |       |      |      |          |            |         |
| <i>Scenario 13</i>           |         |          |       |      |      |          |            |         |
| Sufficient Information       | 34      | 18       | 68    | 11   | 10   | 19       | 25         | 14      |
| Lowest Dose Deemed Unsafe    | 0       | 1        | 0     | 0    | 0    | 1        | 1          | 1       |
| Highest Dose Deemed too Safe | 36      | 77       | 28    | 37   | 59   | 79       | 72         | 71      |
| Precision                    | 74      | 1        | 2     | 58   | 45   | 0        | 0          | 0       |
| Hard Safety                  | 0       | 0        | 0     | 0    | 0    | 0        | 0          | 0       |
| Maximum Patients             | 4       | 5        | 7     | 1    | 0    | 5        | 4          | 20      |
| Unsafe (Total)               | 0       | 1        | 0     | 0    | 0    | 1        | 1          | 1       |
| Sufficient/Precision (Total) | 96      | 19       | 70    | 67   | 45   | 19       | 25         | 14      |
| <i>Stopping Reason</i>       |         |          |       |      |      |          |            |         |
| <i>Scenario 14</i>           |         |          |       |      |      |          |            |         |
| Sufficient Information       | 84      | 61       | 76    | 25   | 20   | 78       | 91         | 72      |
| Lowest Dose Deemed Unsafe    | 1       | 4        | 0     | 0    | 0    | 3        | 3          | 3       |
| Highest Dose Deemed too Safe | 1       | 3        | 0     | 0    | 0    | 3        | 1          | 1       |
| Precision                    | 4       | 30       | 32    | 85   | 99   | 0        | 0          | 0       |
| Hard Safety                  | 0       | 0        | 0     | 0    | 0    | 0        | 0          | 0       |
| Maximum Patients             | 25      | 19       | 7     | 1    | 0    | 31       | 10         | 32      |
| Unsafe (Total)               | 1       | 4        | 0     | 0    | 0    | 3        | 3          | 3       |
| Sufficient/Precision (Total) | 88      | 82       | 97    | 99   | 99   | 78       | 91         | 72      |
| <i>Stopping Reason</i>       |         |          |       |      |      |          |            |         |
| <i>Scenario 15</i>           |         |          |       |      |      |          |            |         |
| Sufficient Information       | 91      | 77       | 94    | 64   | 36   | 90       | 92         | 90      |
| Lowest Dose Deemed Unsafe    | 8       | 15       | 1     | 3    | 1    | 8        | 8          | 9       |
| Highest Dose Deemed too Safe | 0       | 0        | 0     | 0    | 0    | 0        | 0          | 0       |
| Precision                    | 0       | 16       | 10    | 40   | 96   | 0        | 0          | 0       |
| Hard Safety                  | 1       | 0        | 1     | 2    | 1    | 0        | 0          | 0       |
| Maximum Patients             | 3       | 2        | 1     | 1    | 0    | 6        | 1          | 1       |
| Unsafe (Total)               | 8       | 15       | 1     | 4    | 2    | 8        | 8          | 9       |
| Sufficient/Precision (Total) | 91      | 85       | 99    | 95   | 98   | 90       | 92         | 90      |
| <i>Stopping Reason</i>       |         |          |       |      |      |          |            |         |
| <i>Scenario 16</i>           |         |          |       |      |      |          |            |         |
| Sufficient Information       | 15      | 4        | 34    | 11   | 2    | 20       | 20         | 19      |
| Lowest Dose Deemed Unsafe    | 85      | 96       | 66    | 86   | 95   | 80       | 80         | 81      |
| Highest Dose Deemed too Safe | 0       | 0        | 0     | 0    | 0    | 0        | 0          | 0       |
| Precision                    | 0       | 10       | 0     | 0    | 10   | 0        | 0          | 0       |
| Hard Safety                  | 60      | 23       | 66    | 47   | 47   | 24       | 24         | 24      |
| Maximum Patients             | 0       | 0        | 0     | 0    | 0    | 0        | 0          | 0       |
| Unsafe (Total)               | 85      | 96       | 66    | 89   | 96   | 80       | 80         | 81      |
| Sufficient/Precision (Total) | 15      | 4        | 34    | 11   | 4    | 20       | 20         | 19      |
| <i>Stopping Reason</i>       |         |          |       |      |      |          |            |         |
| <i>Scenario 17 (D)</i>       |         |          |       |      |      |          |            |         |
| Sufficient Information       | 96      | 64       | 63    | 5    | 8    | 99       | 99         | 99      |
| Lowest Dose Deemed Unsafe    | 0       | 1        | 0     | 0    | 0    | 1        | 1          | 1       |
| Highest Dose Deemed too Safe | 0       | 0        | 0     | 0    | 0    | 0        | 0          | 0       |
| Precision                    | 0       | 44       | 60    | 99   | 100  | 0        | 0          | 0       |
| Hard Safety                  | 0       | 0        | 0     | 0    | 0    | 0        | 0          | 0       |
| Maximum Patients             | 13      | 4        | 0     | 0    | 0    | 1        | 1          | 1       |
| Unsafe (Total)               | 0       | 1        | 0     | 0    | 0    | 1        | 1          | 1       |
| Sufficient/Precision (Total) | 96      | 98       | 100   | 100  | 100  | 99       | 99         | 99      |

Table 16: Setting 2: Summary of stopping reasons for Setting 2 (Scenarios 13-17), expressed as a percentage of simulations where the given stopping rule was triggered. The sum of these may be greater than 100, since it is possible for more than one rule to be triggered in a single trial.

## 4 Model-Assisted Designs using Original Hyper-Parameters

|        | TITEBOIN | TITE_mTPI2 | R_mTPI2 |
|--------|----------|------------|---------|
| 1 (A)  | 48       | 45         | 48      |
| 2      | 38       | 32         | 36      |
| 3      | 34       | 29         | 30      |
| 4      | 29       | 26         | 23      |
| 5      | 16       | 16         | 8       |
| 6      | 7        | 14         | 5       |
| 7(B)   | 17       | 21         | 10      |
| 8      | 39       | 28         | 36      |
| 9 (C)  | 44       | 52         | 53      |
| 10     | 38       | 31         | 37      |
| 11     | 36       | 35         | 39      |
| 12     | 15       | 18         | 8       |
| 13     | 72       | 72         | 64      |
| 14     | 27       | 28         | 19      |
| 15     | 53       | 47         | 49      |
| 16     | 74       | 80         | 81      |
| 17 (D) | 96       | 97         | 96      |
| Mean   | 40       | 39         | 38      |

Table 17: Setting 2: Percentage of simulations correctly identifying MTD for model-assisted designs with original parameters.



|                 | <b>TITEBOIN</b>                     | <b>TITE_mTPI2</b> | <b>R_mTPI2</b> |
|-----------------|-------------------------------------|-------------------|----------------|
| <i>Scenario</i> | <i>Mean Duration in Weeks (sd)</i>  |                   |                |
| 1 (A)           | 23 (12)                             | 42 (27)           | 39 (29)        |
| 2               | 30 (14)                             | 59 (30)           | 60 (32)        |
| 3               | 39 (13)                             | 78 (27)           | 84 (29)        |
| 4               | 47 (14)                             | 95 (24)           | 104 (25)       |
| 5               | 51 (15)                             | 103 (24)          | 114 (27)       |
| 6               | 52 (13)                             | 110 (19)          | 122 (21)       |
| 7 (B)           | 39 (17)                             | 79 (33)           | 84 (38)        |
| 8               | 42 (12)                             | 85 (25)           | 92 (25)        |
| 9 (C)           | 18 (11)                             | 32 (27)           | 26 (24)        |
| 10              | 43 (13)                             | 87 (25)           | 95 (26)        |
| 11              | 36 (14)                             | 72 (30)           | 76 (33)        |
| 12              | 51 (15)                             | 104 (24)          | 115 (27)       |
| 13              | 46 (12)                             | 103 (19)          | 115 (23)       |
| 14              | 44 (15)                             | 89 (28)           | 98 (32)        |
| 15              | 31 (11)                             | 58 (22)           | 63 (27)        |
| 16              | 12 (7)                              | 16 (13)           | 13 (12)        |
| 17 (D)          | 41 (7)                              | 76 (10)           | 92 (13)        |
| Mean            | 38                                  | 76                | 82             |
| <i>Scenario</i> | <i>Mean Number of Patients (sd)</i> |                   |                |
| 1 (A)           | 11 (6)                              | 13 (7)            | 11 (6)         |
| 2               | 15 (6)                              | 17 (7)            | 16 (7)         |
| 3               | 19 (6)                              | 21 (5)            | 21 (6)         |
| 4               | 22 (5)                              | 24 (4)            | 24 (5)         |
| 5               | 24 (5)                              | 24 (5)            | 26 (5)         |
| 6               | 25 (4)                              | 24 (4)            | 26 (4)         |
| 7 (B)           | 19 (7)                              | 21 (7)            | 20 (8)         |
| 8               | 21 (5)                              | 22 (4)            | 22 (5)         |
| 9 (C)           | 9 (5)                               | 10 (7)            | 8 (6)          |
| 10              | 21 (5)                              | 23 (4)            | 23 (5)         |
| 11              | 18 (7)                              | 20 (6)            | 19 (7)         |
| 12              | 24 (5)                              | 24 (5)            | 26 (5)         |
| 13              | 22 (5)                              | 21 (5)            | 24 (5)         |
| 14              | 21 (6)                              | 23 (5)            | 23 (6)         |
| 15              | 16 (5)                              | 17 (6)            | 16 (6)         |
| 16              | 6 (3)                               | 6 (4)             | 5 (3)          |
| 17 (D)          | 20 (3)                              | 20 (3)            | 21 (3)         |
| Mean            | 18                                  | 19                | 19             |

Table 18: Setting 2: Measures of size of the trial across scenarios, mean and sd of duration and number of patients for model-assisted designs with original parameters.

|                 | <b>TITEBOIN</b>                                     | <b>TITE_mTPI2</b> | <b>R_mTPI2</b> |
|-----------------|-----------------------------------------------------|-------------------|----------------|
| <i>Scenario</i> | <i>Mean Number of Patients on MTD (sd)</i>          |                   |                |
| 1 (A)           | 7 (3)                                               | 6 (3)             | 7 (3)          |
| 2               | 5 (4)                                               | 6 (4)             | 6 (4)          |
| 3               | 5 (4)                                               | 6 (4)             | 6 (4)          |
| 4               | 5 (4)                                               | 5 (3)             | 5 (4)          |
| 5               | 4 (4)                                               | 5 (4)             | 4 (4)          |
| 6               | 3 (3)                                               | 4 (4)             | 3 (3)          |
| 7 (B)           | 3 (4)                                               | 4 (4)             | 3 (4)          |
| 8               | 6 (3)                                               | 6 (3)             | 7 (3)          |
| 9 (C)           | NA (NA)                                             | NA (NA)           | NA (NA)        |
| 10              | 6 (3)                                               | 6 (3)             | 7 (3)          |
| 11              | 6 (3)                                               | 6 (3)             | 6 (3)          |
| 12              | 4 (4)                                               | 5 (4)             | 4 (4)          |
| 13              | NA (NA)                                             | NA (NA)           | NA (NA)        |
| 14              | 5 (4)                                               | 5 (4)             | 5 (4)          |
| 15              | 7 (3)                                               | 7 (3)             | 7 (3)          |
| 16              | NA (NA)                                             | NA (NA)           | NA (NA)        |
| 17 (D)          | 9 (1)                                               | 9 (1)             | 9 (1)          |
| Mean            | 5                                                   | 6                 | 6              |
| <i>Scenario</i> | <i>Mean Number of Patients on Unsafe Doses (sd)</i> |                   |                |
| 1               | 5 (6)                                               | 7 (7)             | 4 (6)          |
| 2               | 4 (5)                                               | 6 (7)             | 3 (5)          |
| 3               | 3 (5)                                               | 5 (6)             | 3 (5)          |
| 4               | 3 (4)                                               | 5 (5)             | 3 (4)          |
| 5               | 2 (3)                                               | 3 (3)             | 1 (3)          |
| 6               | 0 (0)                                               | 0 (0)             | 0 (0)          |
| 7               | 2 (3)                                               | 3 (5)             | 1 (3)          |
| 8               | 5 (6)                                               | 7 (7)             | 4 (6)          |
| 9               | 9 (5)                                               | 10 (7)            | 8 (6)          |
| 10              | 6 (6)                                               | 8 (7)             | 5 (6)          |
| 11              | 7 (7)                                               | 9 (7)             | 7 (6)          |
| 12              | 2 (3)                                               | 3 (3)             | 2 (3)          |
| 13              | 0 (0)                                               | 0 (0)             | 0 (0)          |
| 14              | 2 (4)                                               | 4 (5)             | 2 (3)          |
| 15              | 3 (4)                                               | 5 (5)             | 3 (4)          |
| 16              | 6 (3)                                               | 6 (4)             | 5 (3)          |
| 17              | 5 (2)                                               | 5 (2)             | 5 (2)          |
| Mean            | 4                                                   | 5                 | 3              |

Table 19: Setting 2: Mean and standard deviation of the number of patients assigned to the true MTD and to unsafe doses for model-assisted designs with original parameters.

|                              | TITEBOIN | TITE_mTPI2            | R_mTPI2 |
|------------------------------|----------|-----------------------|---------|
| <i>Stopping Reason</i>       |          | <i>Scenario 1 (A)</i> |         |
| Sufficient Information       | 74       | 68                    | 67      |
| Lowest Dose Deemed Unsafe    | 26       | 31                    | 32      |
| Highest Dose Deemed too Safe | 0        | 0                     | 0       |
| Precision                    | 0        | 0                     | 0       |
| Hard Safety                  | 6        | 4                     | 4       |
| Maximum Patients             | 0        | 2                     | 0       |
| Unsafe (Total)               | 26       | 31                    | 32      |
| Sufficient/Precision (Total) | 74       | 68                    | 67      |
| <i>Stopping Reason</i>       |          | <i>Scenario 2</i>     |         |
| Sufficient Information       | 88       | 84                    | 83      |
| Lowest Dose Deemed Unsafe    | 11       | 13                    | 15      |
| Highest Dose Deemed too Safe | 0        | 0                     | 0       |
| Precision                    | 0        | 0                     | 0       |
| Hard Safety                  | 1        | 1                     | 1       |
| Maximum Patients             | 2        | 6                     | 3       |
| Unsafe (Total)               | 11       | 13                    | 15      |
| Sufficient/Precision (Total) | 88       | 84                    | 83      |
| <i>Stopping Reason</i>       |          | <i>Scenario 3</i>     |         |
| Sufficient Information       | 94       | 91                    | 88      |
| Lowest Dose Deemed Unsafe    | 3        | 3                     | 3       |
| Highest Dose Deemed too Safe | 0        | 0                     | 0       |
| Precision                    | 0        | 0                     | 0       |
| Hard Safety                  | 0        | 0                     | 0       |
| Maximum Patients             | 7        | 10                    | 12      |
| Unsafe (Total)               | 3        | 3                     | 3       |
| Sufficient/Precision (Total) | 94       | 91                    | 88      |
| <i>Stopping Reason</i>       |          | <i>Scenario 4</i>     |         |
| Sufficient Information       | 90       | 87                    | 79      |
| Lowest Dose Deemed Unsafe    | 1        | 1                     | 1       |
| Highest Dose Deemed too Safe | 2        | 4                     | 1       |
| Precision                    | 0        | 0                     | 0       |
| Hard Safety                  | 0        | 0                     | 0       |
| Maximum Patients             | 17       | 16                    | 26      |
| Unsafe (Total)               | 1        | 1                     | 1       |
| Sufficient/Precision (Total) | 90       | 87                    | 79      |
| <i>Stopping Reason</i>       |          | <i>Scenario 5</i>     |         |
| Sufficient Information       | 77       | 80                    | 63      |
| Lowest Dose Deemed Unsafe    | 1        | 1                     | 1       |
| Highest Dose Deemed too Safe | 9        | 12                    | 6       |
| Precision                    | 0        | 0                     | 0       |
| Hard Safety                  | 0        | 0                     | 0       |
| Maximum Patients             | 25       | 21                    | 40      |
| Unsafe (Total)               | 1        | 1                     | 1       |
| Sufficient/Precision (Total) | 77       | 80                    | 63      |
| <i>Stopping Reason</i>       |          | <i>Scenario 6</i>     |         |
| Sufficient Information       | 59       | 66                    | 47      |
| Lowest Dose Deemed Unsafe    | 0        | 0                     | 0       |
| Highest Dose Deemed too Safe | 30       | 29                    | 23      |
| Precision                    | 0        | 0                     | 0       |
| Hard Safety                  | 0        | 0                     | 0       |
| Maximum Patients             | 26       | 23                    | 41      |
| Unsafe (Total)               | 0        | 0                     | 0       |
| Sufficient/Precision (Total) | 59       | 66                    | 47      |

Table 20: Setting 2: Summary of stopping reasons for Setting 2 (Scenarios 1-6), expressed as a percentage of simulations where the given stopping rule was triggered for model-assisted designs with original parameters. The sum of these may be greater than 100, since it is possible for more than one rule to be triggered in a single trial.

|                              | TITEBOIN | TITE_mTPI2 | R_mTPI2 |
|------------------------------|----------|------------|---------|
| <i>Stopping Reason</i>       |          |            |         |
| <i>Scenario 7 (B)</i>        |          |            |         |
| Sufficient Information       | 88       | 86         | 77      |
| Lowest Dose Deemed Unsafe    | 6        | 6          | 8       |
| Highest Dose Deemed too Safe | 0        | 1          | 0       |
| Precision                    | 0        | 0          | 0       |
| Hard Safety                  | 1        | 0          | 0       |
| Maximum Patients             | 11       | 12         | 20      |
| Unsafe (Total)               | 6        | 6          | 8       |
| Sufficient/Precision (Total) | 88       | 86         | 77      |
| <i>Stopping Reason</i>       |          |            |         |
| <i>Scenario 8</i>            |          |            |         |
| Sufficient Information       | 94       | 90         | 88      |
| Lowest Dose Deemed Unsafe    | 1        | 1          | 1       |
| Highest Dose Deemed too Safe | 1        | 3          | 1       |
| Precision                    | 0        | 0          | 0       |
| Hard Safety                  | 0        | 0          | 0       |
| Maximum Patients             | 9        | 12         | 14      |
| Unsafe (Total)               | 1        | 1          | 1       |
| Sufficient/Precision (Total) | 94       | 90         | 88      |
| <i>Stopping Reason</i>       |          |            |         |
| <i>Scenario 9 (C)</i>        |          |            |         |
| Sufficient Information       | 55       | 47         | 47      |
| Lowest Dose Deemed Unsafe    | 44       | 52         | 53      |
| Highest Dose Deemed too Safe | 0        | 0          | 0       |
| Precision                    | 0        | 0          | 0       |
| Hard Safety                  | 15       | 10         | 11      |
| Maximum Patients             | 0        | 2          | 0       |
| Unsafe (Total)               | 44       | 52         | 53      |
| Sufficient/Precision (Total) | 55       | 47         | 47      |
| <i>Stopping Reason</i>       |          |            |         |
| <i>Scenario 10</i>           |          |            |         |
| Sufficient Information       | 94       | 90         | 87      |
| Lowest Dose Deemed Unsafe    | 1        | 1          | 1       |
| Highest Dose Deemed too Safe | 1        | 2          | 0       |
| Precision                    | 0        | 0          | 0       |
| Hard Safety                  | 0        | 0          | 0       |
| Maximum Patients             | 10       | 13         | 17      |
| Unsafe (Total)               | 1        | 1          | 1       |
| Sufficient/Precision (Total) | 94       | 90         | 87      |
| <i>Stopping Reason</i>       |          |            |         |
| <i>Scenario 11</i>           |          |            |         |
| Sufficient Information       | 91       | 88         | 85      |
| Lowest Dose Deemed Unsafe    | 6        | 6          | 8       |
| Highest Dose Deemed too Safe | 0        | 1          | 0       |
| Precision                    | 0        | 0          | 0       |
| Hard Safety                  | 1        | 0          | 0       |
| Maximum Patients             | 6        | 9          | 9       |
| Unsafe (Total)               | 6        | 6          | 8       |
| Sufficient/Precision (Total) | 91       | 88         | 85      |
| <i>Stopping Reason</i>       |          |            |         |
| <i>Scenario 12</i>           |          |            |         |
| Sufficient Information       | 74       | 79         | 59      |
| Lowest Dose Deemed Unsafe    | 1        | 1          | 1       |
| Highest Dose Deemed too Safe | 11       | 13         | 8       |
| Precision                    | 0        | 0          | 0       |
| Hard Safety                  | 0        | 0          | 0       |
| Maximum Patients             | 27       | 22         | 42      |
| Unsafe (Total)               | 1        | 1          | 1       |
| Sufficient/Precision (Total) | 74       | 79         | 59      |

Table 21: Setting 2: Summary of stopping reasons for Setting 2 (Scenarios 7-12), expressed as a percentage of simulations where the given stopping rule was triggered for model-assisted designs with original parameters. The sum of these may be greater than 100, since it is possible for more than one rule to be triggered in a single trial.

|                              | TITEBOIN | TITE_mTPI2 | R_mTPI2 |
|------------------------------|----------|------------|---------|
| <i>Stopping Reason</i>       |          |            |         |
| <i>Scenario 13</i>           |          |            |         |
| Sufficient Information       | 23       | 25         | 19      |
| Lowest Dose Deemed Unsafe    | 1        | 1          | 1       |
| Highest Dose Deemed too Safe | 72       | 72         | 64      |
| Precision                    | 0        | 0          | 0       |
| Hard Safety                  | 0        | 0          | 0       |
| Maximum Patients             | 11       | 11         | 25      |
| Unsafe (Total)               | 1        | 1          | 1       |
| Sufficient/Precision (Total) | 23       | 25         | 19      |
| <i>Stopping Reason</i>       |          |            |         |
| <i>Scenario 14</i>           |          |            |         |
| Sufficient Information       | 90       | 88         | 78      |
| Lowest Dose Deemed Unsafe    | 3        | 3          | 3       |
| Highest Dose Deemed too Safe | 1        | 1          | 0       |
| Precision                    | 0        | 0          | 0       |
| Hard Safety                  | 0        | 0          | 0       |
| Maximum Patients             | 15       | 14         | 25      |
| Unsafe (Total)               | 3        | 3          | 3       |
| Sufficient/Precision (Total) | 90       | 88         | 78      |
| <i>Stopping Reason</i>       |          |            |         |
| <i>Scenario 15</i>           |          |            |         |
| Sufficient Information       | 93       | 91         | 90      |
| Lowest Dose Deemed Unsafe    | 7        | 8          | 9       |
| Highest Dose Deemed too Safe | 0        | 0          | 0       |
| Precision                    | 0        | 0          | 0       |
| Hard Safety                  | 1        | 0          | 0       |
| Maximum Patients             | 1        | 2          | 1       |
| Unsafe (Total)               | 7        | 8          | 9       |
| Sufficient/Precision (Total) | 93       | 91         | 90      |
| <i>Stopping Reason</i>       |          |            |         |
| <i>Scenario 16</i>           |          |            |         |
| Sufficient Information       | 26       | 20         | 19      |
| Lowest Dose Deemed Unsafe    | 74       | 80         | 81      |
| Highest Dose Deemed too Safe | 0        | 0          | 0       |
| Precision                    | 0        | 0          | 0       |
| Hard Safety                  | 33       | 24         | 24      |
| Maximum Patients             | 0        | 0          | 0       |
| Unsafe (Total)               | 74       | 80         | 81      |
| Sufficient/Precision (Total) | 26       | 20         | 19      |
| <i>Stopping Reason</i>       |          |            |         |
| <i>Scenario 17 (D)</i>       |          |            |         |
| Sufficient Information       | 99       | 99         | 99      |
| Lowest Dose Deemed Unsafe    | 1        | 1          | 1       |
| Highest Dose Deemed too Safe | 0        | 0          | 0       |
| Precision                    | 0        | 0          | 0       |
| Hard Safety                  | 0        | 0          | 0       |
| Maximum Patients             | 1        | 1          | 2       |
| Unsafe (Total)               | 1        | 1          | 1       |
| Sufficient/Precision (Total) | 99       | 99         | 99      |

Table 22: Setting 2: Summary of stopping reasons for Setting 2 (Scenarios 13-17), expressed as a percentage of simulations where the given stopping rule was triggered for model-assisted designs with original parameters. The sum of these may be greater than 100, since it is possible for more than one rule to be triggered in a single trial.
